# Supplementary material for: Prosthetic Joint Infections Caused by Mycobacterium tuberculosis Complex—An ESGIAI–ESGMYC Multicenter, Retrospective Study and Literature Review
Source: MDPI journal article supplement (doi:10.3390/microorganisms12050849), 2024-04-24
Supplement: s1 [file s1]

| Sex | Age | Prior TBC | Psoas Abscess | Miliary TBC | Joint    | Time From Surgery | Treatment                 | Months of treatment | Species | Surgery                       | Outcome             | Reference |
|-----|-----|-----------|---------------|-------------|----------|-------------------|---------------------------|---------------------|---------|-------------------------------|---------------------|-----------|
| M   | 80  | No        | No            | No          | Hip      | 132               | IRE (15)                  | 15                  | BCG     | DAIR                          | SUPPRESSION         | [1]       |
| F   | 73  | No        | No            | No          | Knee     | 8                 | IREP (9)+IRP (3)          | 12                  | TBC     | DAIR                          | CURE                | [2]       |
| F   | 75  | No        | No            | No          | Shoulder | 3                 | IRP (2)+IR (7)            | 9                   | TBC     | REVISION ARTHROPLASTY         | CURE                | [3]       |
| M   | 37  | No        | No            | No          | Elbow    | 14                | IREP (6)                  | 6                   | TBC     | 2-STAGE REVISION ARTHROPLASTY | CURE                | [4]       |
| M   | 61  | No        | No            | No          | Hip      | 24                |                           |                     | TBC     | RESECTION ARTHROPLASTY        | CURE                | [5]       |
| M   | 80  | No        | No            | Yes         | Knee     | 96                | IREP (2)+IR (10)          | 12                  | TBC     | NO                            | CURE                | [6]       |
| F   | 52  | No        | No            | No          | Hip      | 120               | IR (15)                   | 15                  | TBC     | REVISION ARTHROPLASTY         | CURE                | [7]       |
| F   | 44  | No        | No            | No          | Hip      | 276               | IE (16)                   | 16                  | TBC     | RESECTION ARTHROPLASTY        | CURE                | [7]       |
| F   | 52  | Yes       | No            | No          | Hip      | 24                | IRE (6) + IE (18)         | 24                  | TBC     | DAIR                          | CURE                | [7]       |
| M   | 74  | Yes       | No            | No          | Hip      | 36                | IRE (3) + IR (9) + I (12) | 24                  | TBC     | DAIR                          | THERAPEUTIC FAILURE | [7]       |
| F   | 55  | Yes       | No            | No          | Hip      | 24                | IRES(6) + IR (33)         | 39                  | TBC     | 2-STAGE REVISION ARTHROPLASTY | CURE                | [7]       |
| M   | 60  | Yes       | No            | No          | Hip      | 12                | IRE(7)+IE(2)+I(3)         | 12                  | TBC     | RESECTION ARTHROPLASTY        | CURE                | [7]       |
| M   | 60  | No        | No            | No          | Hip      | 360               | IRE (1)+IR (18)           | 19                  | TBC     | RESECTION ARTHROPLASTY        | CURE                | [7]       |
| M   | 65  | No        | No            | No          | Knee     | 1                 |                           |                     | TBC     | NO                            | CURE                | [8]       |
| F   | 55  | No        | No            | No          | Hip      | 24                | IREP (4)+IR (13)          | 17                  | TBC     | NO                            | CURE                | [9]       |
| F   | 47  | Yes       | No            | No          | Hip      | 36                | IREP (3)+IR (3)           | 6                   | TBC     | REVISION ARTHROPLASTY         | CURE                | [9]       |
| M   | 70  | No        | No            | No          | Hip      | 12                | IREP (2)+IR (6)           | 8                   | TBC     | 2-STAGE REVISION ARTHROPLASTY | CURE                | [10]      |
| M   | 77  | Yes       | No            | Yes         | Hip      | 18                | RES (7)                   | 7                   | TBC     | REVISION ARTHROPLASTY         | CURE                | [11]      |
| F   | 72  | No        | No            | No          | Knee     | 96                | IRP (24)                  | 24                  | TBC     | ARTHRODESIS                   | CURE                | [12]      |
| M   | 79  | No        |               |             | Knee     | 120               |                           |                     | TBC     | REVISION ARTHROPLASTY         |                     | [13]      |
| F   | 46  | No        | No            | No          | Hip      | 4                 | IRP (8)                   | 8                   | TBC     | NO                            | NO DATA             | [14]      |
| M   | 74  | No        | No            | No          | Hip      | 30                |                           |                     | TBC     | RESECTION ARTHROPLASTY        | CURE                | [15]      |
| F   | 40  | No        | No            | No          | Hip      | 8                 |                           |                     | TBC     | RESECTION ARTHROPLASTY        | CURE                | [15]      |
| M   | 75  | Yes       | No            | No          | Hip      | 4                 | IRP (2)+IR (10)           | 12                  | TBC     | REVISION ARTHROPLASTY         | CURE                | [16]      |

|   |    |     |     |     |       |     |                   |    |     |                               |                     |               |
|---|----|-----|-----|-----|-------|-----|-------------------|----|-----|-------------------------------|---------------------|---------------|
| M | 68 | No  | No  | No  | Wrist | 24  | IREP (2)+IR (12)  | 14 | TBC | REVISION ARTHROPLASTY         | CURE                | [17]          |
| F | 92 | No  | No  | No  | Hip   | 36  | IRE (1)+IE (8), L | 9  | TBC | REVISION ARTHROPLASTY         | CURE                | [17]          |
| F | 72 | No  | No  | No  | Hip   | 84  | IRP (2)+IR (10)   | 12 | TBC | 2-STAGE REVISION ARTHROPLASTY | CURE                | [17]          |
| F | 79 | No  | No  | No  | Hip   | 1   | IRE (5)           | 5  | TBC | 2-STAGE REVISION ARTHROPLASTY | CURE                | [17]          |
| F | 80 | No  | No  | No  | Knee  | 1   | IRP (2)+IR (12)   | 14 | TBC | 2-STAGE REVISION ARTHROPLASTY | DIED (OTHER CAUSES) | [17]          |
| M | 77 | No  | No  | No  | Knee  | 96  | IREP (2)+IRE (22) | 24 | BCG | 2-STAGE REVISION ARTHROPLASTY | CURE                | [18]          |
| F | 75 | Yes | No  | No  | Knee  | 3   | IREP (9)          | 9  | TBC | DAIR                          | CURE                | [19]          |
| F | 67 | Yes | Yes | No  | Hip   | 16  | IREP (2)+IR (18)  | 20 | TBC | DAIR                          | CURE                | [20]          |
| F | 69 | No  | No  | No  | Hip   | 12  |                   |    | TBC | RESECTION ARTHROPLASTY        | CURE                | [21]          |
| F | 71 | No  | No  | No  | Hip   | 12  | IRE (18)          | 18 | TBC | NO                            | CURE                | [21]          |
| F | 22 | Yes | No  | No  | Hip   | 36  | IRE (19)          | 19 | TBC | DAIR                          | CURE                | [21]          |
| F | 64 | No  | No  | No  | Hip   | 48  |                   | 18 | TBC | DAIR                          | CURE                | [21]          |
| F | 75 | No  | No  | No  | Hip   | 120 |                   |    | TBC | RESECTION ARTHROPLASTY        | CURE                | [21]          |
| F | 77 | No  | No  | Yes | Knee  |     | IRP               |    | TBC | NO                            | CURE                | [22]          |
| M | 73 | No  | No  | No  | Knee  | 14  | IREP (2)+IR (10)  | 12 | TBC | REVISION ARTHROPLASTY         | CURE                | [23]          |
| F | 54 | No  | No  | No  | Hip   | 48  | REPL (6)          | 6  | TBC | DAIR                          | CURE                | Present study |
| M | 74 | Yes | No  | No  | Knee  | 60  | IREP (2)+IR (6)   | 8  | TBC | 2-STAGE REVISION ARTHROPLASTY | CURE                | Present study |
| M | 76 | Yes | No  | No  | Hip   | 96  | IREL (3)+IR (12)  | 15 | TBC | DAIR                          | CURE                | Present study |
| M | 47 | No  | No  | No  | Hip   | 1   |                   |    | TBC | 1-STAGE EXCHANGE              | CURE                | Present study |
| M | 87 | No  | No  | No  | Hip   | 10  | IREP              |    | TBC | NO                            | DIED (OTHER)        | Present study |
| F | 76 | No  | No  | No  | Hip   | 2   | IRP (2)+IR (7)    | 9  | TBC | RESECTION ARTHROPLASTY        | CURE                | Present study |
| F | 86 | Yes | No  | No  | Hip   | 2   | IRP (2)+IR (9)    | 11 | TBC | NO                            | CURE                | Present study |
| F | 64 | Yes | No  | No  | Knee  | 3   | IREP (2)+IR (6)   | 8  | TBC | 1-STAGE EXCHANGE              | CURE                | Present study |
| F | 87 | No  | No  | No  | Hip   | 3   | IREPAL            |    | TBC | DAIR                          | CURE                | Present study |
| F | 70 | No  | No  | No  | Hip   | 6   | IREP (2)+IR (10)  | 12 | TBC | DAIR                          | CURE                | Present study |

|   |    |     |    |     |      |     |                  |    |     |                               |                     |               |
|---|----|-----|----|-----|------|-----|------------------|----|-----|-------------------------------|---------------------|---------------|
| F | 81 | No  | No | No  | Hip  | 12  |                  | 12 | TBC | 1-STAGE EXCHANGE              | CURE                | Present study |
| F | 59 | No  | No | No  | Hip  |     |                  | 14 |     | 1-STAGE EXCHANGE              | CURE                | Present study |
| F | 71 | No  | No | No  | Hip  |     |                  | 12 |     | 1-STAGE EXCHANGE              | CURE                | Present study |
| M | 81 | No  | No | No  | Hip  | 132 | IREP (3)+RP (5)  | 8  | TBC | 2-STAGE REVISION ARTHROPLASTY | CURE                | Present study |
| F | 82 | No  | No | No  | Hip  | 60  | IRPL (4)+IP (8)  | 12 | TBC | 2-STAGE REVISION ARTHROPLASTY | CURE                | Present study |
| M | 47 | Yes | No | No  | Knee | 18  | IRE (12)         | 12 | TBC | DAIR                          | CURE                | [24]          |
| M | 78 | No  | No | No  | Hip  | 6   | IRE (3)+IR (6)   | 9  | TBC | RESECTION ARTHROPLASTY        | CURE                | [25]          |
| M | 67 | No  | No | Yes | Knee | 1   | IRE (6)+IR (6)   | 12 | TBC | NO                            | CURE                | [26]          |
| M | 77 | No  | No | No  | Hip  | 216 | IRE (12)         | 12 | BCG | 2-STAGE REVISION ARTHROPLASTY | CURE                | [27]          |
| M | 82 | No  | No | No  | Hip  | 120 | IREP+IR (12)     | 12 | BCG | 2-STAGE REVISION ARTHROPLASTY | CURE                | [28]          |
| M | 66 | No  | No | No  | Hip  | 60  | IR (6)           | 6  | BCG | REVISION ARTHROPLASTY         | DIED (OTHER CAUSES) | [29]          |
| F | 60 | Yes | No | No  | Knee | 7   | IREP (12)+IR (9) | 21 | TBC | REVISION ARTHROPLASTY         | CURE                | [30]          |
| F | 78 | No  | No | No  | Hip  | 5   | IR               |    | TBC | 2-STAGE REVISION ARTHROPLASTY | CURE                | [31]          |
| M | 27 | Yes | No | No  | Hip  | 3   | IE               |    | TBC | RESECTION ARTHROPLASTY        | CURE                | [32]          |
| M | 71 | Yes | No | No  | Hip  | 5   | IRE (12), P      | 12 | TBC | DAIR                          | CURE                | [33]          |
| F | 54 | No  | No | No  | Hip  | 108 | IE               |    | TBC | RESECTION ARTHROPLASTY        | CURE                | [34]          |
| F | 79 | No  | No | No  | Knee | 31  | IEP              |    | TBC | DAIR                          | RELAPSE             | [34]          |
| M | 49 | No  | No | No  | Hip  | 120 | IRP+C/O          |    | TBC | 2-STAGE REVISION ARTHROPLASTY |                     | [34]          |
| M | 83 | No  | No | No  | Knee | 10  | IRE              |    | TBC | DAIR                          | CURE                | [34]          |
| M | 61 | No  | No | No  | Hip  | 7   | IRE              |    | TBC | RESECTION ARTHROPLASTY        | CURE                | [34]          |
| F | 48 | Yes | No | No  | Hip  | 420 | NO ANTIBIOTIC    |    | TBC | GIRDLESTONE                   | CURE                | [35]          |
| F | 51 | Yes | No | No  | Hip  | 492 | IRE              |    | TBC | NO                            | CURE                | [35]          |
| F | 85 | No  | No | No  | Knee | 1   |                  |    | TBC | NO                            | CURE                | [36]          |
| F | 72 | No  | No | Yes | Hip  | 108 | IEP              |    | TBC | RESECTION ARTHROPLASTY        | CURE                | [37]          |

|   |    |     |    |     |          |     |                            |    |     |                                     |                        |      |
|---|----|-----|----|-----|----------|-----|----------------------------|----|-----|-------------------------------------|------------------------|------|
| F | 75 | No  | No | No  | Knee     | 3   | IE (18), R                 | 18 | TBC | RESECTION<br>ARTHROPLASTY           | CURE                   | [38] |
| F | 36 | Yes | No | No  | Knee     | 11  | IREPM (19)                 | 19 | TBC | 2-STAGE<br>REVISION<br>ARTHROPLASTY | CURE                   | [39] |
| F | 67 | Yes | No | No  | Hip      | 2   | IRSP (3)+IR (9)            | 12 | TBC | REVISION<br>ARTHROPLASTY            | CURE                   | [40] |
| F | 66 | No  | No | No  | Hip      | 48  | IRP (9), R                 | 9  | TBC | REVISION<br>ARTHROPLASTY            | CURE                   | [41] |
| F | 73 | No  | No | Yes | Shoulder | 2   | IREL (2)+IL (10)           | 12 | BOV | RESECTION<br>ARTHROPLASTY           | DIED (OTHER<br>CAUSES) | [42] |
| F | 77 | No  | No | No  | Knee     | 36  | IRPM (2)+IR (9)            | 11 | TBC | 2-STAGE<br>REVISION<br>ARTHROPLASTY | CURE                   | [43] |
| M | 84 | No  | No | No  | Knee     | 72  | RE                         |    | BCG | GIRDLESTONE                         | CURE                   | [44] |
| M | 74 | No  | No | No  | Shoulder | 444 | IREP (2)+IR (8)            | 10 | TBC | RESECTION<br>ARTHROPLASTY           | CURE                   | [45] |
| F | 79 | No  | No | No  | Knee     | 2   | IREP (12)                  | 12 | TBC | DAIR                                | CURE                   | [46] |
| F | 81 | No  | No | Yes | Hip      | 48  | IRS (4)+IR (32)            | 36 | TBC | RESECTION<br>ARTHROPLASTY           | CURE                   | [47] |
| F | 70 | No  | No | No  | Hip      | 8   |                            |    | TBC | NO                                  | CURE                   | [48] |
| F | 49 | No  | No | No  | Hip      | 8   |                            |    | TBC | NO                                  | CURE                   | [48] |
| M | 50 | No  | No | No  | Hip      | 36  | IREP (2)+IR (10)           | 12 | TBC | REVISION<br>ARTHROPLASTY            | CURE                   | [49] |
| F | 71 | No  | No | No  | Hip      | 2   | IRE (2)+IR (10)            | 12 | TBC | REVISION<br>ARTHROPLASTY            | CURE                   | [49] |
| F | 75 | No  | No | No  | Knee     | 180 | IREP (1)+IEP<br>(4)+IP (1) | 6  | TBC | RESECTION<br>ARTHROPLASTY           | DIED                   | [50] |
| M | 64 | No  | No | No  | Hip      | 3   | IREP (2)+IRE<br>(8)+IR (8) | 18 | TBC | 2-STAGE<br>REVISION<br>ARTHROPLASTY | CURE                   | [51] |
| F | 71 | Yes | No | No  | Hip      | 24  | NO ANTIBIOTIC              |    | TBC | GIRDLESTONE                         | CURE                   | [52] |
| M | 66 | No  | No | No  | Knee     | 2   | IRP (6)                    | 6  | TBC | 2-STAGE<br>REVISION<br>ARTHROPLASTY | CURE                   | [53] |
| F | 65 | Yes | No | Yes | Knee     | 3   | IRP (6)                    | 6  | TBC | 2-STAGE<br>REVISION<br>ARTHROPLASTY | CURE                   | [53] |
| F | 77 | No  | No | No  | Knee     | 4   | IEP (8)                    | 8  | TBC | DAIR                                | CURE                   | [53] |
| M | 48 | No  | No | Yes | Knee     | 9   | IREPM (1)                  | 1  | TBC | NO                                  | DIED                   | [54] |
| F | 77 | Yes | No | No  | Hip      | 84  | IRS (2)+IR (16)            | 18 | TBC | DAIR                                | CURE                   | [55] |
| M |    | No  |    |     | Hip      | 1   |                            |    | TBC | NO                                  |                        | [56] |
| M | 70 | No  | No | No  | Hip      | 144 | IREM (1)+IRE<br>(11)       | 12 | BCG | 2-STAGE<br>REVISION<br>ARTHROPLASTY | CURE                   | [57] |

|   |    |     |    |     |      |     |                             |    |     |                                     |      |      |
|---|----|-----|----|-----|------|-----|-----------------------------|----|-----|-------------------------------------|------|------|
| F | 32 | No  | No | No  | Hip  | 60  | ACP (2)+P (2)               | 4  | TBC | 2-STAGE<br>REVISION<br>ARTHROPLASTY | CURE | [58] |
| M | 80 | No  | No | No  | Hip  | 12  | IREP (2)+IR (16)            | 18 | TBC | NO                                  | CURE | [59] |
| M | 69 | No  | No | Yes | Hip  | 12  | IREP (2)+IR (16)            | 18 | TBC | NO                                  | CURE | [59] |
| F | 64 | No  | No | No  | Hip  | 12  | IREP (2)+IR (16)            | 18 | TBC | NO                                  | CURE | [59] |
| F | 83 | No  | No | No  | Hip  | 12  |                             |    | TBC | NO                                  | LOST | [59] |
| M | 56 | Yes | No | No  | Hip  | 24  | IREP (2)+IR (10)            | 12 | TBC | REVISION<br>ARTHROPLASTY            | CURE | [59] |
| M | 86 | No  | No | Yes | Hip  | 42  | IREP (2)+IR (13)            | 15 | TBC | NO                                  | CURE | [59] |
| M | 84 | No  | No | No  | Hip  | 84  | IREP (2)+IR (12)            | 14 | TBC | 2-STAGE<br>REVISION<br>ARTHROPLASTY | CURE | [59] |
| M | 59 | No  | No | Yes | Hip  | 156 | IREP (2)+IR (10)            | 12 | TBC | REVISION<br>ARTHROPLASTY            | CURE | [59] |
| F | 84 | Yes | No | No  | Hip  | 240 | IREP (2)+IR (13)            | 15 | TBC | NO                                  | CURE | [59] |
| M | 37 | No  | No | No  | Hip  | 12  |                             |    | TBC | RESECTION<br>ARTHROPLASTY           |      | [60] |
| F | 82 | No  | No | Yes | Hip  | 24  | IREP (2)+IR                 |    | TBC | NO                                  | CURE | [61] |
| F | 73 | No  | No | No  | Knee | 168 | IREP (4)+IRP<br>(3)+IR (11) | 18 | TBC | NO                                  | CURE | [62] |
| M | 90 | No  | No | No  | Hip  | 372 | IREP (2)+IRE<br>(10)        | 12 | BCG | DAIR                                | CURE | [63] |
| M | 64 | No  |    |     | Hip  | 24  |                             |    | TBC | REVISION<br>ARTHROPLASTY            |      | [64] |
| M | 91 | No  | No | No  | Hip  | 204 | IRE (2)+IR (10)             | 12 | BCG | 2-STAGE<br>REVISION<br>ARTHROPLASTY | CURE | [65] |
| M | 84 | No  | No | No  | Hip  | 1   | IREP (2)+IR (7)             | 9  | TBC | NO                                  | CURE | [66] |
| F | 82 | No  | No | No  | Hip  | 1   | IRP (2)+IR (2)              | 4  | TBC | REVISION<br>ARTHROPLASTY            | LOST | [66] |
| M | 86 | No  | No | No  | Hip  | 120 | IRP (6)+IR (6)+<br>I(12)    | 24 | BCG | REVISION<br>ARTHROPLASTY            | CURE | [67] |
| M | 66 | No  | No | No  | Hip  | 60  | IR (12)                     | 12 | BCG | DAIR                                | CURE | [68] |
| M | 79 | No  | No | No  | Hip  | 18  | IREM (6)                    | 6  | BCG | 2-STAGE<br>REVISION<br>ARTHROPLASTY | CURE | [69] |
| M | 76 | No  | No | No  | Knee | 216 | IRE (24)                    | 24 | BCG | 2-STAGE<br>REVISION<br>ARTHROPLASTY | CURE | [70] |
|   |    | Yes |    |     | Hip  | 34  |                             |    | TBC | 2-STAGE<br>REVISION<br>ARTHROPLASTY | CURE | [71] |
|   |    | No  |    |     | Knee | 34  |                             |    | TBC | NO                                  | DIED | [71] |
|   |    | No  |    |     | Hip  | 34  |                             |    | TBC | DAIR                                | CURE | [71] |

|   |    |     |    |     |          |     |                             |    |     |                                     |                        |      |
|---|----|-----|----|-----|----------|-----|-----------------------------|----|-----|-------------------------------------|------------------------|------|
|   |    | Yes |    |     | Hip      | 34  |                             |    | TBC | 2-STAGE<br>REVISION<br>ARTHROPLASTY | CURE                   | [71] |
|   |    | Yes |    |     | Hip      | 34  |                             |    | TBC | 2-STAGE<br>REVISION<br>ARTHROPLASTY | CURE                   | [71] |
| F | 59 | No  | No | No  | Hip      | 15  | REP (12)                    | 12 | TBC | DAIR                                | CURE                   | [72] |
| F | 70 | No  | No | No  | Knee     | 54  | RE (12), I                  | 12 | TBC | DAIR                                | CURE                   | [13] |
| M | 76 | No  | No | No  | Hip      | 72  | IRE                         | 9  | BCG | 2-STAGE<br>REVISION<br>ARTHROPLASTY | CURE                   | [73] |
| M | 86 | No  | No | No  | Shoulder | 24  | REL (1)                     | 1  | BCG | REVISION<br>ARTHROPLASTY            | DIED (OTHER<br>CAUSES) | [73] |
| M | 66 | No  | No | No  | Hip      | 324 | IRE (6)                     | 6  | BCG | REVISION<br>ARTHROPLASTY            | CURE                   | [74] |
| F | 74 | Yes | No | Yes | Knee     | 12  | IRE (14)                    | 14 | TBC | DAIR                                | RELAPSE                | [75] |
| M | 68 | Yes | No | No  | Knee     | 1   | IRE (14)                    | 14 | TBC | NO                                  | RELAPSE                | [75] |
| M | 70 | Yes | No | No  | Knee     | 2   | IRE (14)                    | 14 | TBC | NO                                  | RELAPSE                | [75] |
| F | 61 | Yes | No | No  | Knee     | 6   | IRE (14)                    | 14 | TBC | NO                                  | RELAPSE                | [75] |
| M | 55 | No  | No | No  | Knee     | 1   | IREP (2)+IR (10)            | 12 | TBC | NO                                  | CURE                   | [76] |
| F | 72 | No  | No | No  | Hip      | 36  | IR (12)                     | 12 | TBC | RESECTION<br>ARTHROPLASTY           |                        | [77] |
| F | 70 | No  | No | No  | Knee     | 456 | IR (12)                     | 12 | TBC | RESECTION<br>ARTHROPLASTY           | CURE                   | [77] |
| F | 71 | Yes | No | No  | Knee     | 20  | IE (18)                     | 18 | TBC | RESECTION<br>ARTHROPLASTY           | CURE                   | [77] |
| M | 62 | No  | No | Yes | Hip      | 18  | IRP (24)                    | 24 | TBC | REVISION<br>ARTHROPLASTY            | CURE                   | [78] |
| M | 40 | No  | No | Yes | Hip      | 180 | IRE (12)                    | 12 | TBC | RESECTION<br>ARTHROPLASTY           | CURE                   | [78] |
| M | 61 | No  | No | No  | Hip      | 24  | IRE (3)+IR (6)              | 9  | TBC | DAIR                                | CURE                   | [79] |
| F | 84 | No  | No | No  | Knee     | 36  | IREP (2)+IR (10)            | 12 | TBC | NO                                  | CURE                   | [79] |
| M | 79 | Yes | No | No  | Hip      | 48  | IREP (1)+REP<br>(3)+RP (11) | 15 | TBC | REVISION<br>ARTHROPLASTY            | DIED (OTHER<br>CAUSES) | [79] |
| M | 60 | Yes | No | No  | Hip      | 60  | IRE (14)+IR (4)             | 18 | TBC | NO                                  | CURE                   | [79] |
| M | 79 | Yes | No | Yes | Knee     | 84  | IREP (2)+IR (10)            | 12 | TBC | NO                                  | CURE                   | [79] |
| M | 86 | No  | No | No  | Knee     | 108 | IREO (4)+IRO (2)            | 6  | TBC | RESECTION<br>ARTHROPLASTY           | CURE                   | [79] |
| F | 82 | No  | No | No  | Knee     | 108 | IRP (1)+IR (14)             | 15 | TBC | RESECTION<br>ARTHROPLASTY           | CURE                   | [79] |
| M | 69 | Yes | No | No  | Hip      | 120 | IREP (6)+IR (18)            | 24 | TBC | REVISION<br>ARTHROPLASTY            | CURE                   | [79] |
| M | 84 | Yes | No | Yes | Knee     | 156 | IRE (2)+IR (7)              | 9  | TBC | DAIR                                | DIED (OTHER<br>CAUSES) | [79] |

|   |    |     |    |     |          |     |                           |    |     |                               |                |      |
|---|----|-----|----|-----|----------|-----|---------------------------|----|-----|-------------------------------|----------------|------|
| F | 85 | No  | No | No  | Knee     | 168 | IREP (1)+IRE (1)+ IR (10) | 12 | TBC | RESECTION ARTHROPLASTY        | CURE           | [79] |
| M | 71 | Yes | No | Yes | Hip      | 240 | NO ANTIBIOTIC             |    | TBC | NO                            | DIED BEFORE DX | [79] |
| F | 81 | No  | No | Yes | Hip      | 5   | IREP (2)+IR (15)          | 17 | TBC | DAIR                          | CURE           | [79] |
| F | 64 | No  | No | No  | Shoulder | 6   | IRP (2)+IR (30)           | 32 | TBC | DAIR                          | CURE           | [79] |
| F | 27 |     | NO | NO  | Knee     | 36  | IREP (2)+IR (16)          | 18 | TBC | DAIR                          | CURE           | [80] |
| M | 39 | Yes | No | No  | Hip      | 48  | MR (31)                   | 31 | TBC | 2-STAGE REVISION ARTHROPLASTY | CURE           | [81] |
| F | 84 | No  | No | No  | Hip      | 6   | IRP (12)                  | 12 | TBC | REVISION ARTHROPLASTY         | CURE           | [82] |
| F | 84 | No  | No | No  | Hip      | 4   | IRP (12)                  | 12 | TBC | REVISION ARTHROPLASTY         | CURE           | [83] |
| M | 67 | No  | No | Yes | Hip      | 24  | IRE (18)                  | 18 | TBC | REVISION ARTHROPLASTY         | CURE           | [83] |
| M | 61 | No  | No | No  | Hip      | 48  | IRP (18)                  | 18 | TBC | REVISION ARTHROPLASTY         | CURE           | [83] |
| M | 35 | No  | No | Yes | Hip      | 12  | IRE (12)                  | 12 | TBC | RESECTION ARTHROPLASTY        | CURE           | [83] |
| M | 62 | No  | No | No  | Knee     | 36  | IRP (2)+IR (16)           | 18 | TBC | DAIR                          | CURE           | [84] |
| F | 34 | No  | No | No  | Knee     | 48  | IREP (2)+IR (16)          | 18 | TBC | NO                            | CURE           | [84] |
| M | 84 | Yes | No | No  | Knee     | 5   | IREP (12)+IR (9)          | 21 | TBC | REVISION ARTHROPLASTY         | CURE           | [85] |
| M | 73 | No  | No | Yes | Hip      | 108 | IREP (9)                  | 9  | TBC | RESECTION ARTHROPLASTY        | CURE           | [86] |
| M | 72 | Yes | No | Yes | Knee     | 36  | IREP (1)                  | 1  | TBC | DAIR                          | DIED           | [87] |
| M | 70 | No  | No | No  | Hip      | 108 | IREM (3)+IRM (6)+IR (3)   | 12 | BCG | REVISION ARTHROPLASTY         | CURE           | [88] |
| M | 61 | No  | No | No  | Knee     | 12  | IR (24)                   | 24 | TBC | STAGED EXCHANGE               | CURE           | [89] |
| F | 70 | No  | No | No  | Hip      | 4   |                           |    | TBC | NO                            |                | [89] |
| M | 62 | No  | No | No  | Knee     | 1   | IRE (12)                  | 12 | TBC | NO                            | CURE           | [90] |
| M | 63 | No  | No | No  | Knee     | 1   | IR (12)                   | 12 | TBC | NO                            | CURE           | [90] |
| F | 40 |     | NO | NO  | Knee     | 48  |                           |    | TBC | RESECTION ARTHROPLASTY        | CURE           | [91] |

M: Male; F: Female. Prior TBC: Previous diagnosis of tuberculosis. I: Isoniazid; R: Rifampin; E: Ethambutol; P: Pyrazinamide; S: Streptomycin; L: Levofloxacin; M: Moxifloxacin; C: Ciprofloxacin; O: Ofloxacin; A: Amikacin. TBC: *Mycobacterium tuberculosis*; BOV: *Mycobacterium bovis* subsp. *bovis*; BCG: *Mycobacterium bovis* BCG strain. DAIR: Debridement, Antibiotics, and Implant Retention.

## References

1. Aitchison LP, Jayanetti V, Lindstrom ST, Sekel R. Mycobacterium bovis peri-prosthetic hip infection with successful prosthesis retention following intravesical BCG therapy for bladder carcinoma. *Australas Med J* 2015;8:307–14. doi: 10.4066/AMJ.2015.2475
2. Al-Shaikh R, Goodman SB. Delayed-onset Mycobacterium tuberculosis infection with staphylococcal superinfection after total knee replacement. *Am J Orthop (Belle Mead NJ)* 2003;32:302–5.
3. Amouyel T, Gaeremynck P, Gadisseux B, Saab M, Senneville E, Maynou C. Mycobacterium tuberculosis infection of reverse shoulder arthroplasty: a case report. *J Shoulder Elbow Surg* 2019;28:e271–4. doi: 10.1016/j.jse.2019.04.052
4. Asopa V, Wallace AL. Case report: Management of occult tuberculosis infection by 2-stage arthroplasty of the elbow. *J Shoulder Elbow Surg* 2004;13:364–5. doi: 10.1016/j.jse.2003.12.012
5. Baldini N, Toni A, Gregg T, Giunti A. Deep sepsis from Mycobacterium tuberculosis after total hip replacement. Case report. *Arch Orthop Trauma Surg* (1978) 1988;107:186–8. doi: 10.1007/BF00451602
6. Barry M, Akkielah L, Askar MA, Bin Nasser AS. Miliary tuberculosis with delayed-onset total knee arthroplasty Mycobacteria tuberculosis infection successfully treated with medical therapy alone: A case report and literature review. *Knee* 2019;26:1152–8. doi: 10.1016/j.knee.2019.07.010
7. Berbari EF, Hanssen AD, Duffy MC, Steckelberg JM, Osmon DR. Prosthetic joint infection due to Mycobacterium tuberculosis: a case series and review of the literature. *Am J Orthop (Belle Mead NJ)* 1998;27:219–27.
8. Besser MI. Total knee replacement in unsuspected tuberculosis of the joint. *Br Med J* 1980 14;280:1434. doi: 10.1136/bmj.280.6229.1434
9. Bernard L, Arvieux C, Brunschweiler B, Touchais S, Ansart S, Bru J-P, et al. Antibiotic Therapy for 6 or 12 Weeks for Prosthetic Joint Infection. *N Engl J Med* 2021 27;384:1991–2001. doi: 10.1056/NEJMoa2020198
10. Brown A, Grubbs P, Mongey A-B. Infection of total hip prosthesis by Mycobacterium tuberculosis and Mycobacterium chelonae in a patient with rheumatoid arthritis. *Clin Rheumatol* 2008;27:543–5. doi: 10.1007/s10067-007-0788-6
11. Bruns J, Luessenhop S, Behrens P. Haematogenous tuberculous infection following revision of a loosened total hip replacement. *Langenbecks Arch Surg* 1998;383:265–8. doi: 10.1007/s004230050130
12. Bryan WJ, Doherty JH, Sculco TP. Tuberculosis in a rheumatoid patient. A case report. *Clin Orthop Relat Res* 1982;206–8.
13. Spinner RJ, Sexton DJ, Goldner RD, Levin LS. Periprosthetic infections due to Mycobacterium tuberculosis in patients with no prior history of tuberculosis. *J Arthroplasty* 1996;11:217–22. doi: 10.1016/s0883-5403(05)80023-3



14. Cansü E, Erdogan F, Ulusam AO. Incision infection with Mycobacterium tuberculosis after total hip arthroplasty without any primary tuberculosis focus. *J Arthroplasty* 2011;26:505.e1-3. doi: 10.1016/j.arth.2009.11.025
15. Carbon C, Brion NV, Darcy M, Thomas M, Lamotte-Barrillon S. [Tuberculous infection of total hip prosthesis: report on two cases (author's transl)]. *Ann Med Interne (Paris)* 1981;132:124-5.
16. Carlsson AS, Sanzén L, Mikulowski P. Bilateral tuberculous infection of replaced hips--reactivation 54 years after infection in one knee. *Acta Orthop Scand* 1997;68:74-6. doi: 10.3109/17453679709003982
17. Carrega G, Bartolacci V, Burastero G, Finocchio GC, Ronca A, Riccio G. Prosthetic joint infections due to Mycobacterium tuberculosis: A report of 5 cases. *Int J Surg Case Rep* 2013;4:178-81. doi: 10.1016/j.ijscr.2012.11.011
18. Chazeraïn P, Desplaces N, Mamoudy P, Leonard P, Ziza JM. Prosthetic total knee infection with a bacillus Calmette Guérin (BCG) strain after BCG therapy for bladder cancer. *J Rheumatol* 1993;20:2171-2.
19. de Haan J, Vreeling AWJ, van Hellemond G. Reactivation of ancient joint tuberculosis of the knee following total knee arthroplasty after 61 years: a case report. *Knee* 2008;15:336-8. doi: 10.1016/j.knee.2008.03.004
20. De Nardo P, Corpolongo A, Conte A, Gentilotti E, Narciso P. Total hip replacement infected with Mycobacterium tuberculosis complicated by Addison disease and psoas muscle abscess: a case report. *J Med Case Rep* 2012 10;6:3. doi: 10.1186/1752-1947-6-3
21. Delrieu F, Slaoui O, Evrard J, Amor B, Postel M, Kerboull M. [Mycobacterial infection of the hip following total prosthesis. Study of 6 cases]. *Rev Rhum Mal Osteoartic* 1986;53:113-8.
22. Egües Dubuc C, Uriarte Ecnarro M, Errazquin Aguirre N, Belzunegui Otano J. Prosthesis infection by Mycobacterium tuberculosis in a patient with rheumatoid arthritis: A case report and literature review. *Reumatol Clin* 2014;10:347-9. doi: 10.1016/j.reuma.2014.02.003
23. Elzein FE, Haris M, Alolayan SS, Al Sherbini N. Total knee prosthesis infected with Mycobacterium tuberculosis. *BMJ Case Rep* 2017 7;2017:bcr2017220596, bcr-2017-220596. doi: 10.1136/bcr-2017-220596
24. Eskola A, Santavirta S, Konttinen YT, Tallroth K, Lindholm ST. Arthroplasty for old tuberculosis of the knee. *J Bone Joint Surg Br* 1988;70:767-9. doi: 10.1302/0301-620X.70B5.3192576
25. Fernández-Valencia JA, García S, Riba J. Presumptive infection of a total hip prosthesis by Mycobacterium tuberculosis: a case report. *Acta Orthop Belg* 2003;69:193-6.
26. Gale DW, Harding ML. Total knee arthroplasty in the presence of active tuberculosis. *J Bone Joint Surg Br* 1991;73:1006-7. doi: 10.1302/0301-620X.73B6.1955424
27. Goedertier W, Sioen W. Prosthetic joint infection due to Mycobacterium bovis 5-years after BCG-instillations. *Acta Orthop Belg* 2020;86:239-42.

28. Gomez E, Chiang T, Louie T, Ponnappalli M, Eng R, Huang DB. Prosthetic Joint Infection due to Mycobacterium bovis after Intravesical Instillation of Bacillus Calmette-Guerin (BCG). *Int J Microbiol* 2009;2009:527208. doi: 10.1155/2009/527208
29. Guerra CE, Betts RF, O'Keefe RJ, Shilling JW. Mycobacterium bovis osteomyelitis involving a hip arthroplasty after intravesicular bacille Calmette-Guérin for bladder cancer. *Clin Infect Dis* 1998;27:639–40. doi: 10.1086/514714
30. Harwin SF, Banerjee S, Issa K, Kapadia BH, Pivec R, Khanuja HS, et al. Tubercular prosthetic knee joint infection. *Orthopedics* 2013;36:e1464-1469. doi: 10.3928/01477447-20131021-35
31. Hattrup SJ, Bhagia UT. Shoulder arthroplasty complicated by mycobacterium tuberculosis infection: a case report. *J Shoulder Elbow Surg* 2008;17:e5-7. doi: 10.1016/j.jse.2008.01.146
32. Hecht RH, Meyers MH, Thornhill-Joyes M, Montgomerie JZ. Reactivation of tuberculous infection following total joint replacement. A case report. *J Bone Joint Surg Am* 1983;65:1015–6.
33. Hugate R, Pellegrini VD. Reactivation of ancient tuberculous arthritis of the hip following total hip arthroplasty: a case report. *J Bone Joint Surg Am* 2002;84:101–5. doi: 10.2106/00004623-200201000-00015
34. Jitmuang A, Yuenyongviwat V, Charoencholvanich K, Chayakulkeeree M. Rapidly-growing mycobacterial infection: a recognized cause of early-onset prosthetic joint infection. *BMC Infect Dis* 2017 28;17:802. doi: 10.1186/s12879-017-2926-3
35. Johnson R, Barnes KL, Owen R. Reactivation of tuberculosis after total hip replacement. *J Bone Joint Surg Br* 1979;61-B:148–50. doi: 10.1302/0301-620X.61B2.438263
36. Kadakia AP, Williams R, Langkamer VG. Tuberculous infection in a total knee replacement performed for medial tibial plateau fracture: a case report. *Acta Orthop Belg* 2007;73:661–4.
37. Kaya M, Nagoya S, Yamashita T, Niino N, Fujita M. Peri-prosthetic tuberculous infection of the hip in a patient with no previous history of tuberculosis. *J Bone Joint Surg Br* 2006;88:394–5. doi: 10.1302/0301-620X.88B3.17006
38. Khater FJ, Samnani IQ, Mehta JB, Moorman JP, Myers JW. Prosthetic joint infection by Mycobacterium tuberculosis: an unusual case report with literature review. *South Med J* 2007;100:66–9. doi: 10.1097/01.smj.0000232972.50186.4c
39. Klein GR, Jacquette GM. Prosthetic knee infection in the young immigrant patient--do not forget tuberculosis! *J Arthroplasty* 2012;27:1414.e1-4. doi: 10.1016/j.arth.2011.09.020
40. Krappel FA, Harland U. Failure of osteosynthesis and prosthetic joint infection due to Mycobacterium tuberculosis following a subtrochanteric fracture: a case report and review of the literature. *Arch Orthop Trauma Surg* 2000;120:470–2. doi: 10.1007/s004029900091
41. Kreder HJ, Davey JR. Total hip arthroplasty complicated by tuberculous infection. *J Arthroplasty* 1996;11:111–4. doi: 10.1016/s0883-5403(96)80169-0

42. Langlois ME, Ader F, Dumistrescu O, Servien E, Saison J, Ferry T, et al. Mycobacterium bovis prosthetic joint infection. *Med Mal Infect* 2016;46:445–8. doi: 10.1016/j.medmal.2016.07.005
43. Lara-Oya A, Liébana-Martos MC, Rodríguez-Granger J, Sampedro-Martínez A, Aliaga-Martínez L, Gutierrez-Fernández J, et al. [Tuberculous prosthetic knee joint infection: a case report and literature review]. *Rev Esp Quimioter* 2016;29:214–9.
44. Leach WJ, Halpin DS. Mycobacterium bovis infection of a total hip arthroplasty: a case report. *J Bone Joint Surg Br* 1993;75:661–2. doi: 10.1302/0301-620X.75B4.8331128
45. Lederman E, Kweon C, Chhabra A. Late Mycobacterium tuberculosis infection in the shoulder of an immunocompromised host after hemiarthroplasty: a case report. *J Bone Joint Surg Am* 2011 15;93:e67(1-4). doi: 10.2106/JBJS.J.00710
46. Lee C-L, Wei Y-S, Ho Y-J, Lee C-H. Postoperative Mycobacterium tuberculosis infection after total knee arthroplasty. *Knee* 2009;16:87–9. doi: 10.1016/j.knee.2008.09.006
47. Levin ML. Miliary tuberculosis masquerading as late infection in total hip replacement. *Md Med J* 1985;34:153–5.
48. Lin E, Oliver S, Caspi I, Ezra E, Bubis JJ, Nerubay J. Hip arthroplasty in quiescent mycobacterial infection of hip. *Orthop Rev* 1986;15:232–6.
49. Lo CKL, Chen L, Varma S, Wood GCA, Grant J, Wilson EW. Management of Mycobacterium tuberculosis Prosthetic Joint Infection: 2 Cases and Literature Review. *Open Forum Infect Dis* 2021;8:ofab451. doi: 10.1093/ofid/ofab451
50. Lusk RH, Wienke EC, Milligan TW, Albus TE. Tuberculous and foreign-body granulomatous reactions involving a total knee prosthesis. *Arthritis Rheum* 1995;38:1325–7. doi: 10.1002/art.1780380921
51. Mahale YJ, Aga N. Implant-associated mycobacterium tuberculosis infection following surgical management of fractures: a retrospective observational study. *Bone Joint J* 2015;97-B:1279–83. doi: 10.1302/0301-620X.97B9.35227
52. Maricevic A, Dogas Z, Goic-Barisić I, Barisić I. Reactivation of tuberculosis after total hip replacement - 58 years after primary infection. *Wien Klin Wochenschr* 2008;120:642–3. doi: 10.1007/s00508-008-1006-5
53. Marmor M, Parnes N, Dekel S. Tuberculosis infection complicating total knee arthroplasty: report of 3 cases and review of the literature. *J Arthroplasty* 2004;19:397–400. doi: 10.1016/j.arth.2003.10.015
54. Marschall J, Evison J-M, Droz S, Studer UC, Zimmerli S. Disseminated tuberculosis following total knee arthroplasty in an HIV patient. *Infection* 2008;36:274–8. doi: 10.1007/s15010-007-7011-1
55. McCullough CJ. Tuberculosis as a late complication of total hip replacement. *Acta Orthop Scand* 1977;48:508–10. doi: 10.3109/17453677708989739
56. McLaughlin RE, Allen JR. Total hip replacement in the previously infected hip. *South Med J* 1977;70:573–5. doi: 10.1097/00007611-197705000-00022

57. Metayer B, Menu P, Khatchatourian L, Preuss P, Dauty M, Fouasson-Chailloux A. Prosthetic joint infection with pseudo-tumoral aspect due to *Mycobacterium bovis* infection after Bacillus-Calmette-Guerin therapy. *Ann Phys Rehabil Med* 2018;61:62–4. doi: 10.1016/j.rehab.2017.08.001
58. Mete B, Yemisen N, Aydin S, Babacan M, Ozaras R, Erdogan F, et al. An unusual cause of prosthetic joint infection:: *Mycobacterium tuberculosis*. *Journal of Microbiology and Infectious Diseases* 2012;2:72–5. doi: 10.5799/AHINJS.02.2012.02.0046
59. Meyssonnier V, Zeller V, Malbos S, Heym B, Lhotellier L, Desplaces N, et al. Prosthetic joint infections due to *Mycobacterium tuberculosis*: A retrospective study. *Joint Bone Spine* 2019;86:239–43. doi: 10.1016/j.jbspin.2018.09.008
60. Mouterde P, Deburge A. [Tuberculous infection after total hip replacement. Report of a case (author's transl)]. *Rev Chir Orthop Reparatrice Appar Mot* 1978;64:171–4.
61. Moya Megías R, Fernández Roldán C, Constán Rodríguez J, Javier Martínez MR. Tuberculosis on joint prosthesis as a form of presentation of miliary tuberculosis. *Enferm Infecc Microbiol Clin (Engl Ed)* 2023;41:441–2. doi: 10.1016/j.eimce.2023.04.013
62. Neogi DS, Kumar A, Yadav CS, Singh S. Delayed periprosthetic tuberculosis after total knee replacement: is conservative treatment possible? *Acta Orthop Belg* 2009;75:136–40.
63. Nguyen M-VH, Giordani MM, Thompson GR. The double-edged sword - prosthetic joint infection following BCG treatment for bladder cancer: a case report. *BMC Infect Dis* 2019 18;19:331. doi: 10.1186/s12879-019-3951-1
64. Olsson SS. [Tuberculous infection after hip replacement]. *Lakartidningen* 1981 29;78:1890–1.
65. Patel A, Elzweig J. *Mycobacterium bovis* prosthetic joint infection following intravesical instillation of BCG for bladder cancer. *BMJ Case Rep* 2019 18;12:e231830. doi: 10.1136/bcr-2019-231830
66. Perez-Jorge C, Valdazo-Rojo M, Blanco-Garcia A, Esteban-Moreno J. *Mycobacterium tuberculosis* as cause of therapeutic failure in prosthetic joint infections. *Enferm Infecc Microbiol Clin* 2014;32:204–5. doi: 10.1016/j.eimc.2013.04.022
67. Reigstad O, Siewers P. A total hip replacement infected with *mycobacterium bovis* after intravesicular treatment with Bacille-Calmette-Guérin for bladder cancer. *J Bone Joint Surg Br* 2008;90:225–7. doi: 10.1302/0301-620X.90B2.20038
68. Rispler DT, Stirton JW, Gilde AK, Kane KR. *Mycobacterium bovid* infection of total knee arthroplasty after bacille Calmette-Guérin therapy for bladder cancer. *Am J Orthop (Belle Mead NJ)* 2015;44:E46-48.
69. Riste M, Davda P, Smith EG, Wyllie DH, Dedicoat M, Jog S, et al. Prosthetic hip joint infection by *Bacillus Calmette-Guerin* therapy following intravesical instillation for bladder cancer identified using whole-genome sequencing: a case report. *BMC Infect Dis* 2021 5;21:151. doi: 10.1186/s12879-021-05831-3
70. Segal A, Krauss ES. Infected total hip arthroplasty after intravesical bacillus Calmette-Guérin therapy. *J Arthroplasty* 2007;22:759–62. doi: 10.1016/j.arth.2006.07.010

71. Seng P, Honnorat E, Loffeier V, Drancourt M, Stein A. Mycobacterium tuberculosis and prosthetic joint infection. *Lancet Infect Dis* 2016;16:894. doi: 10.1016/S1473-3099(16)30149-9
72. Shanbhag V, Kotwal R, Gaitonde A, Singhal K. Total hip replacement infected with Mycobacterium tuberculosis. A case report with review of literature. *Acta Orthop Belg* 2007;73:268–74.
73. Srivastava A, Ostrander J, Martin S, Walter N. Mycobacterium bovis infection of total hip arthroplasty after intravesicular bacille Calmette-Guérin therapy. *Am J Orthop (Belle Mead NJ)* 2011;40:E226-228.
74. Stern R, Roscoe C, Misch EA. Mycobacterium bovis BCG osteoarticular infection complicating immune therapy for bladder cancer: a case report. *J Bone Jt Infect* 2021;6:107–10. doi: 10.5194/jbji-6-107-2021
75. Storandt M, Nagpal A. Prosthetic joint infection: an extremely rare complication of intravesicular BCG therapy. *BMJ Case Rep* 2019 10;12:e232809. doi: 10.1136/bcr-2019-232809
76. Su JY, Huang TL, Lin SY. Total knee arthroplasty in tuberculous arthritis. *Clin Orthop Relat Res* 1996;181–7. doi: 10.1097/00003086-199602000-00024
77. Tekin Koruk S, Sipahioğlu S, Calışir C. Periprosthetic tuberculosis of the knee joint treated with antituberculosis drugs: a case report. *Acta Orthop Traumatol Turc* 2013;47:440–3. doi: 10.3944/aott.2013.2511
78. Tokumoto JI, Follansbee SE, Jacobs RA. Prosthetic joint infection due to Mycobacterium tuberculosis: report of three cases. *Clin Infect Dis* 1995;21:134–6. doi: 10.1093/clinids/21.1.134
79. Ueng WN, Shih CH, Hseuh S. Pulmonary tuberculosis as a source of infection after total hip arthroplasty. A report of two cases. *Int Orthop* 1995;19:55–9. doi: 10.1007/BF00184916
80. Uhel F, Corvaisier G, Poinsignon Y, Chirouze C, Beraud G, Grossi O, et al. Mycobacterium tuberculosis prosthetic joint infections: A case series and literature review. *J Infect* 2019;78:27–34. doi: 10.1016/j.jinf.2018.08.008
81. Uppal S, Garg R. Tubercular infection presenting as sinus over ankle joint after knee replacement surgery. *J Glob Infect Dis* 2010;2:71–2. doi: 10.4103/0974-777X.59257
82. Upton A, Woodhouse A, Vaughan R, Newton S, Ellis-Pegler R. Evolution of central nervous system multidrug-resistant Mycobacterium tuberculosis and late relapse of cryptic prosthetic hip joint tuberculosis: complications during treatment of disseminated isoniazid-resistant tuberculosis in an immunocompromised host. *J Clin Microbiol* 2009;47:507–10. doi: 10.1128/JCM.01473-08
83. Van Le T, Duong TB, Hien KQ, Ton QNQ, Huyn T, Binh TP, et al. Two-stage revision for treatment of tuberculous prosthetic hip infection: an outcome analysis. *Eur J Orthop Surg Traumatol* 2023;33:645–51. doi: 10.1007/s00590-022-03317-9
84. Veloci S, Mencarini J, Lagi F, Beltrami G, Campanacci DA, Bartoloni A, et al. Tubercular prosthetic joint infection: two case reports and literature review. *Infection* 2018;46:55–68. doi: 10.1007/s15010-017-1085-1

85. von Keudell A, Nathavitharana R, Yassa D, Abdeen A. An unusual pathogen for prosthetic joint infection. *Lancet Infect Dis* 2016;16:506. doi: 10.1016/S1473-3099(15)00398-9
86. Walczak H. [ON THE TREATMENT OF DIFFERENT TYPES OF RHEUMATIC DISEASES IN PULMONARY TUBERCULOSIS AND LUNG TUMORS]. *Z Tuberk Erkr Thoraxorg* 1964;121:79–82.
87. Wang P-H, Shih K-S, Tsai C-C, Wang H-C. Pulmonary tuberculosis with delayed tuberculosis infection of total knee arthroplasty. *J Formos Med Assoc* 2007;106:82–5. doi: 10.1016/S0929-6646(09)60221-7
88. Williams A, Arnold B, Gwynne-Jones DP. Mycobacterium bovis infection of total hip arthroplasty after intravesicular Bacillus Calmette-Guérin. *Arthroplast Today* 2019;5:416–20. doi: 10.1016/j.artd.2019.08.004
89. Wolfgang GL. Tuberculosis joint infection following total knee arthroplasty. *Clin Orthop Relat Res* 1985;162–6.
90. Wray CC, Roy S. Arthroplasty in tuberculosis of the knee. Two cases of missed diagnosis. *Acta Orthop Scand* 1987;58:296–8. doi: 10.3109/17453678709146492
91. Zeiger LS, Watters W, Sherk H. Scintigraphic detection of prosthetic joint and soft tissue sepsis secondary to tuberculosis. *Clin Nucl Med* 1984;9:638–9. doi: 10.1097/00003072-198411000-00008
